# Supplementary material
Source: MDPI journal article supplement (https://www.mdpi.com/2571-841X/4/2/10)
Supplement: s1 [file s1]

Table S1. Clinical characteristics

| Baseline characteristic              | (n= 29)      |
|--------------------------------------|--------------|
|                                      | M (SD)       |
| Age                                  | 69.7 (3.217) |
| n (%)                                |              |
| Psychopathology                      |              |
| Depressive Disorder                  | 13 (44.8)    |
| Anxiety Disorder                     | 7 (36.8)     |
| Posttraumatic Stress Disorder        | 10 (34.5)    |
| Somatization                         | 4 (13.8)     |
| Most reported somatic complaints     |              |
| Chronic pain                         | 21 (72.4)    |
| Sleep disturbance                    | 6 (20.7)     |
| Functional alteration of the stomach | 8 (27.5)     |
| Headaches                            | 4 (13.8)     |
| Cough                                | 6 (20.7)     |
| Vertigo                              | 2 (6.9)      |
